# Supplementary material for: Novel Organotin(IV) Complexes of 2-[4-Hydroxy-3-((2-hydroxyethylimino)methyl)phenylazo]benzoic Acid: Synthesis, Structure, Noncovalent Interactions and In Vitro Antibacterial Activity
Source: MDPI journal article supplement (doi:10.3390/cryst12111582), 2022-11-07
Supplement: s1 [file s1]

## Supplementary Material

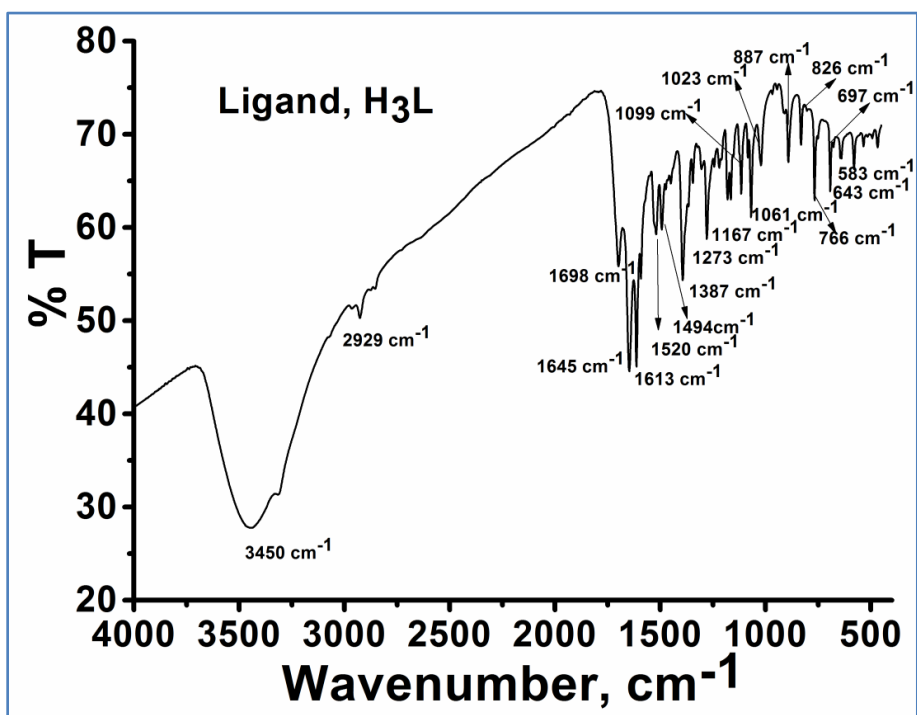

Figure S1. IR spectrum of the ligand, **H<sub>3</sub>L**.

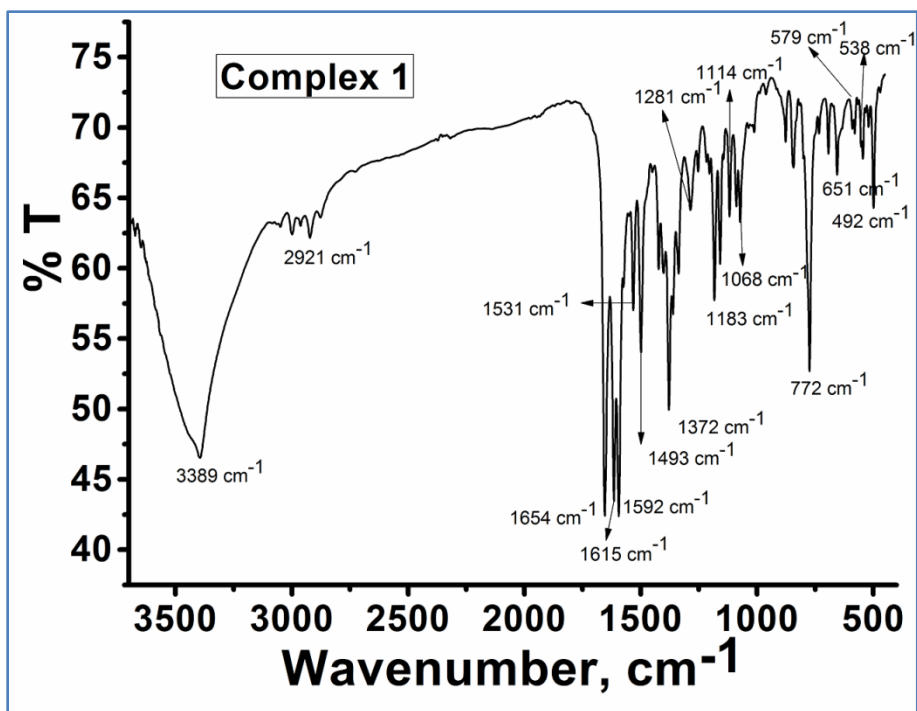

Figure S2. FTIR spectrum of the complex 1.

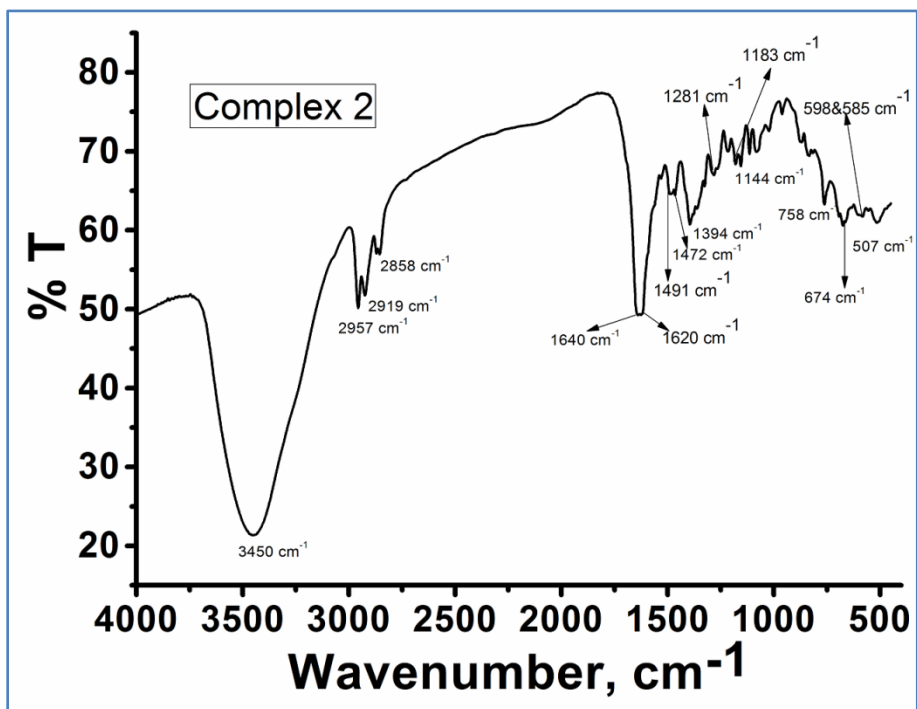

Figure S3. FTIR spectrum of the complex 2.

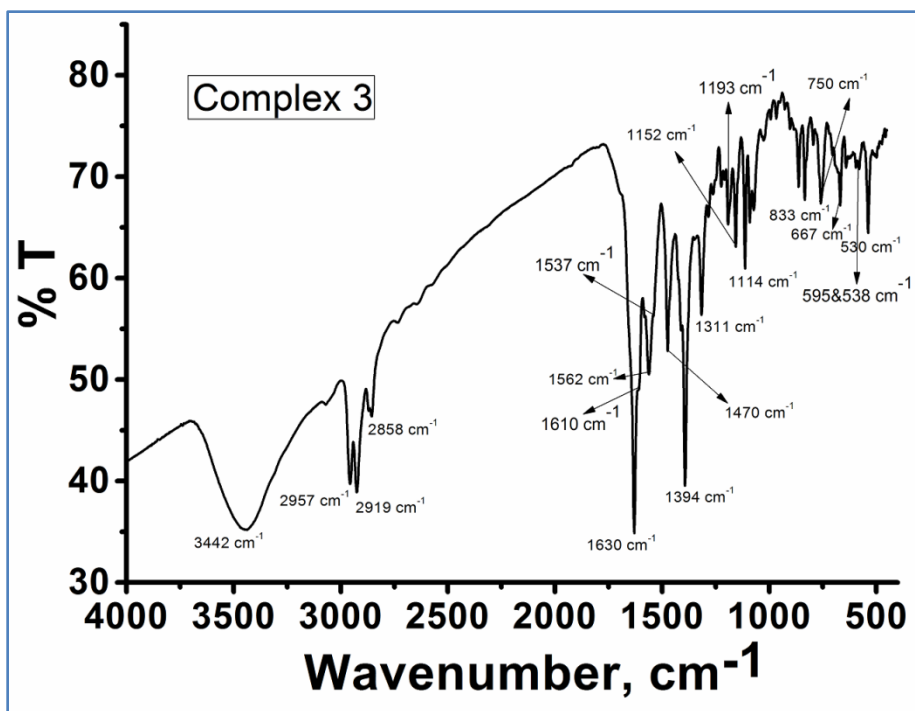

**Figure S4.** FTIR spectrum of the complex 3.

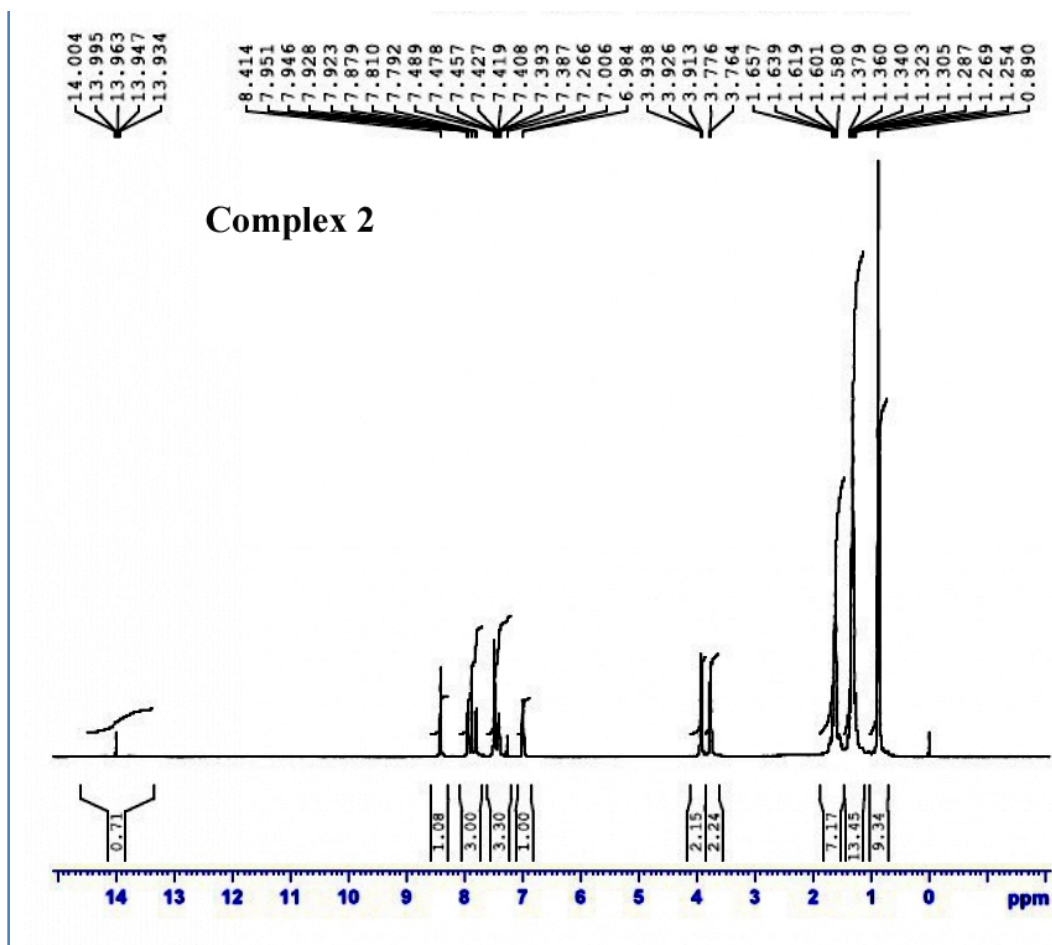

Figure S5.  $^1\text{H}$  NMR spectrum of the complex 2.

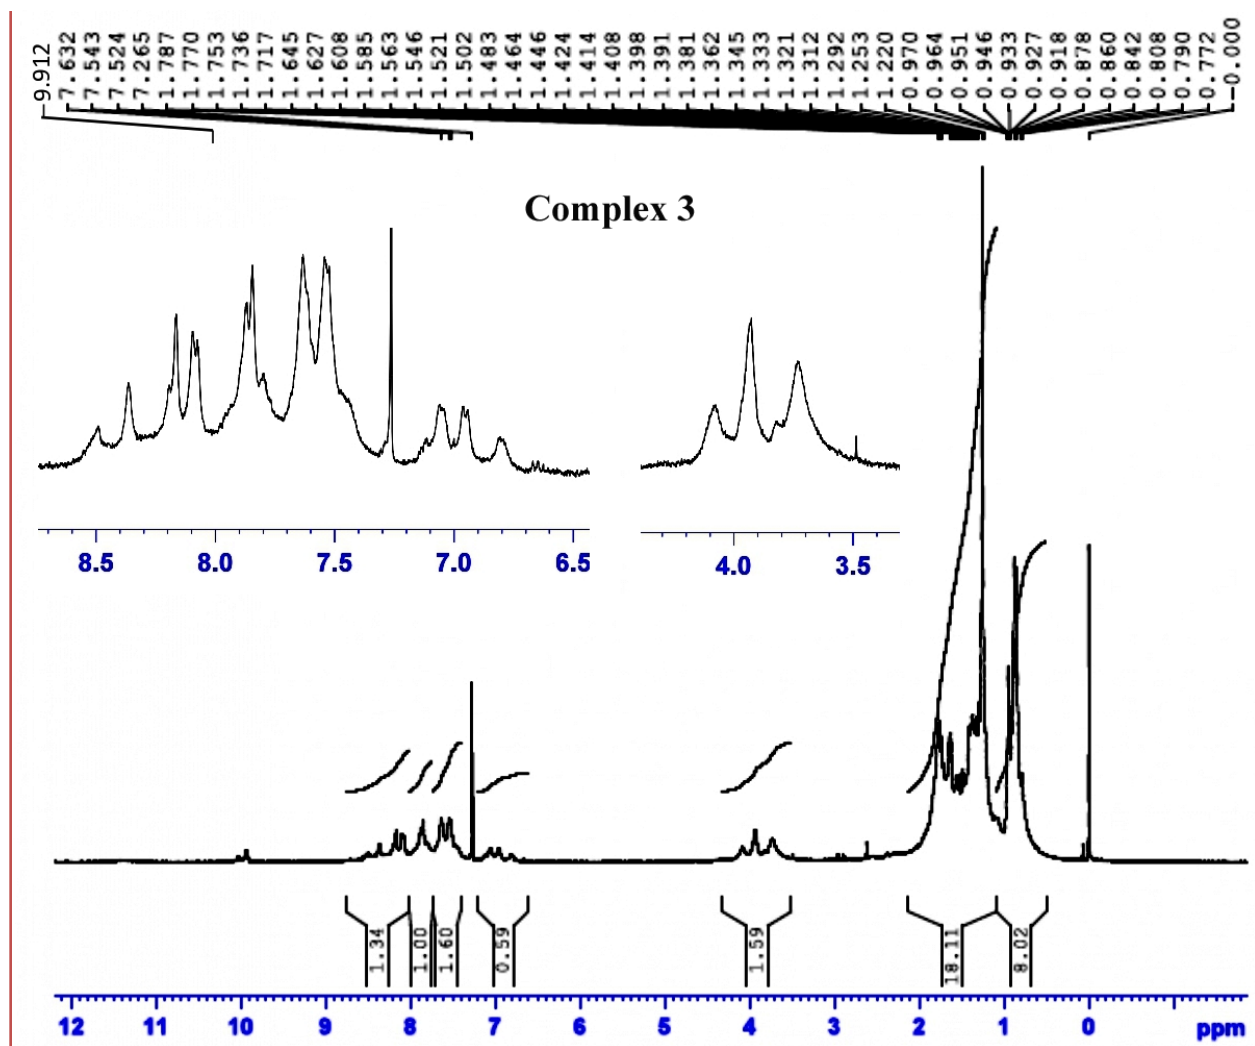

Figure S6.  $^1\text{H}$  NMR spectrum of the complex 3.

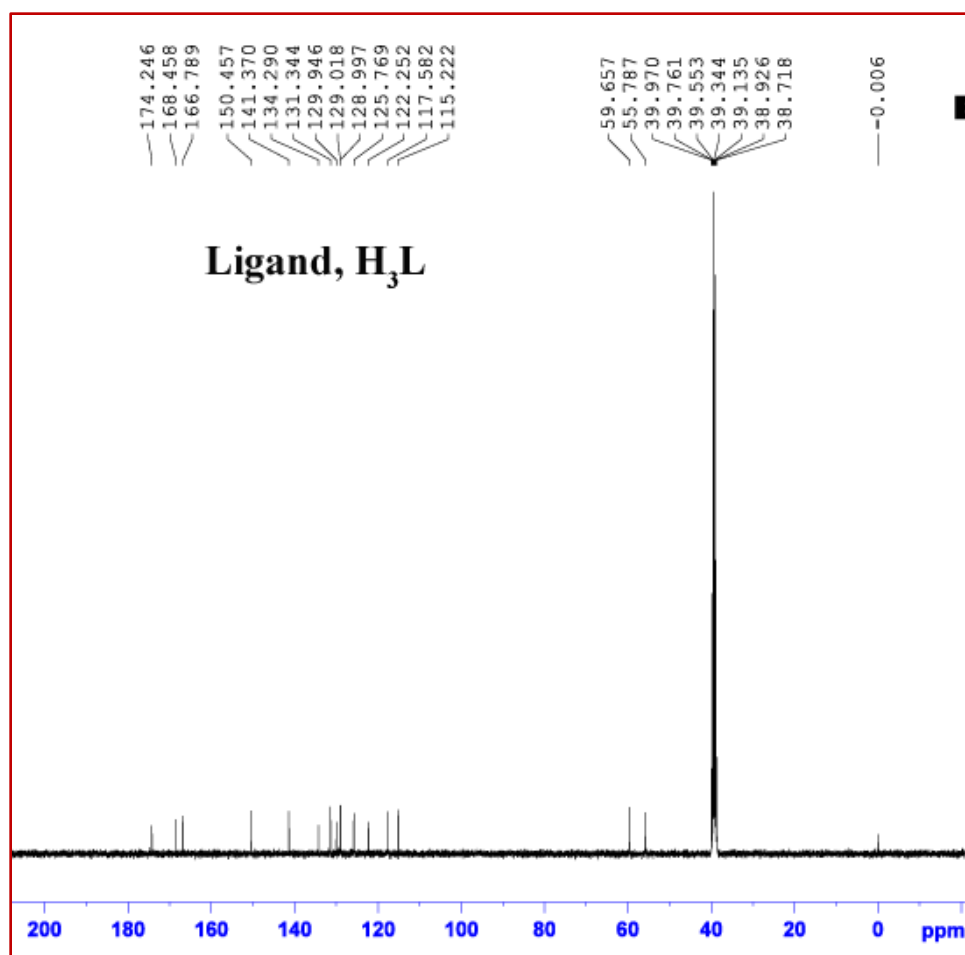

**Figure S7.** <sup>13</sup>C NMR spectrum of the ligand, H<sub>3</sub>L.

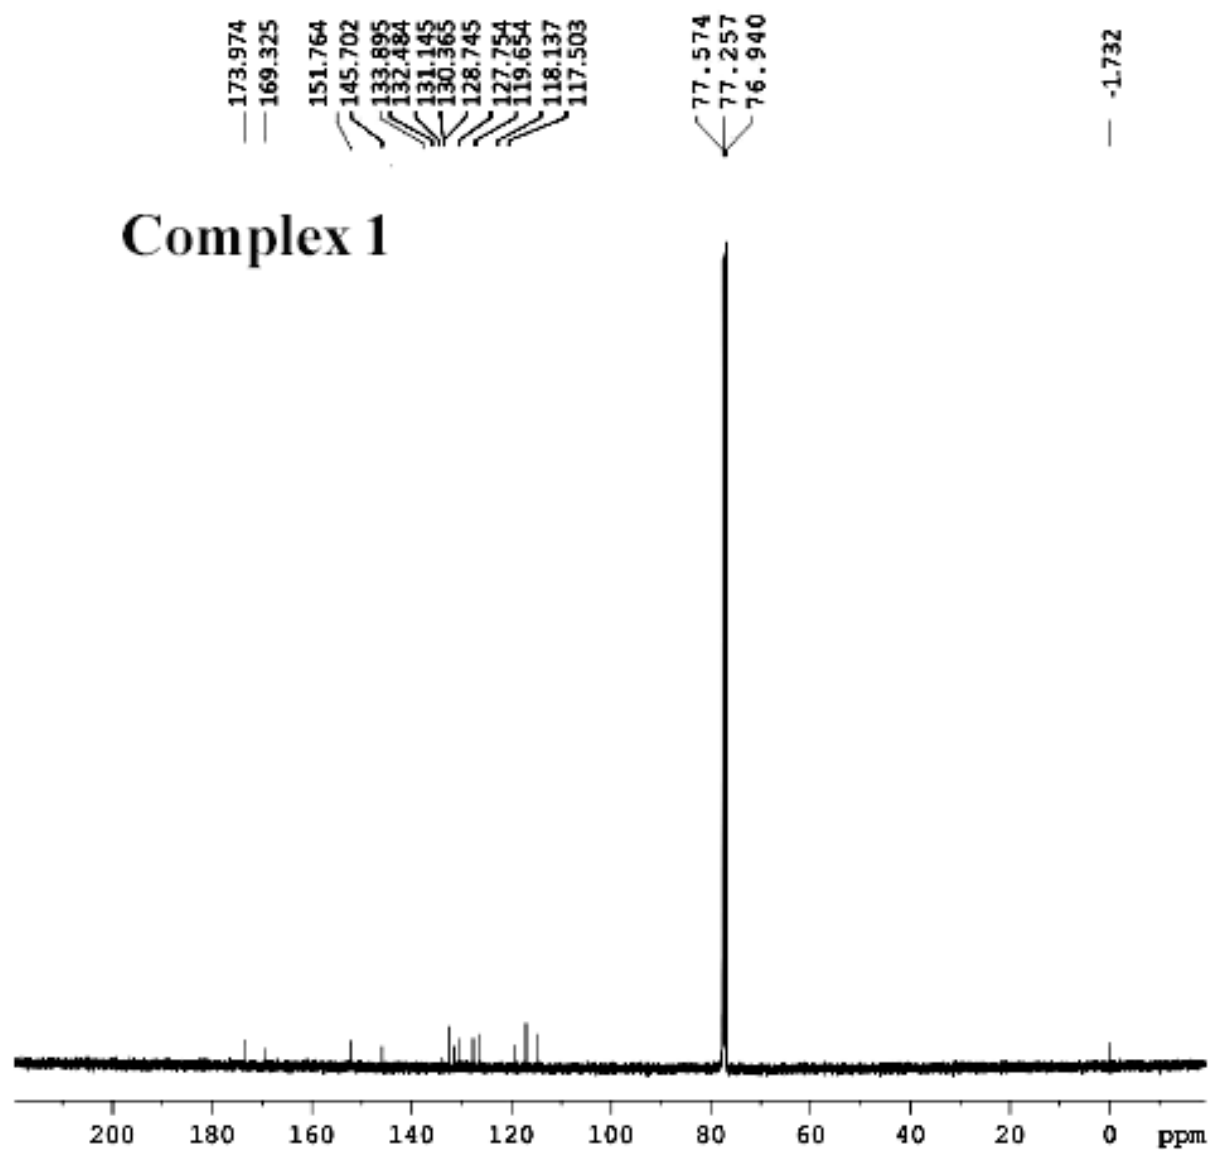

**Figure S8.**  $^{13}\text{C}$  NMR spectrum of the complex 1.

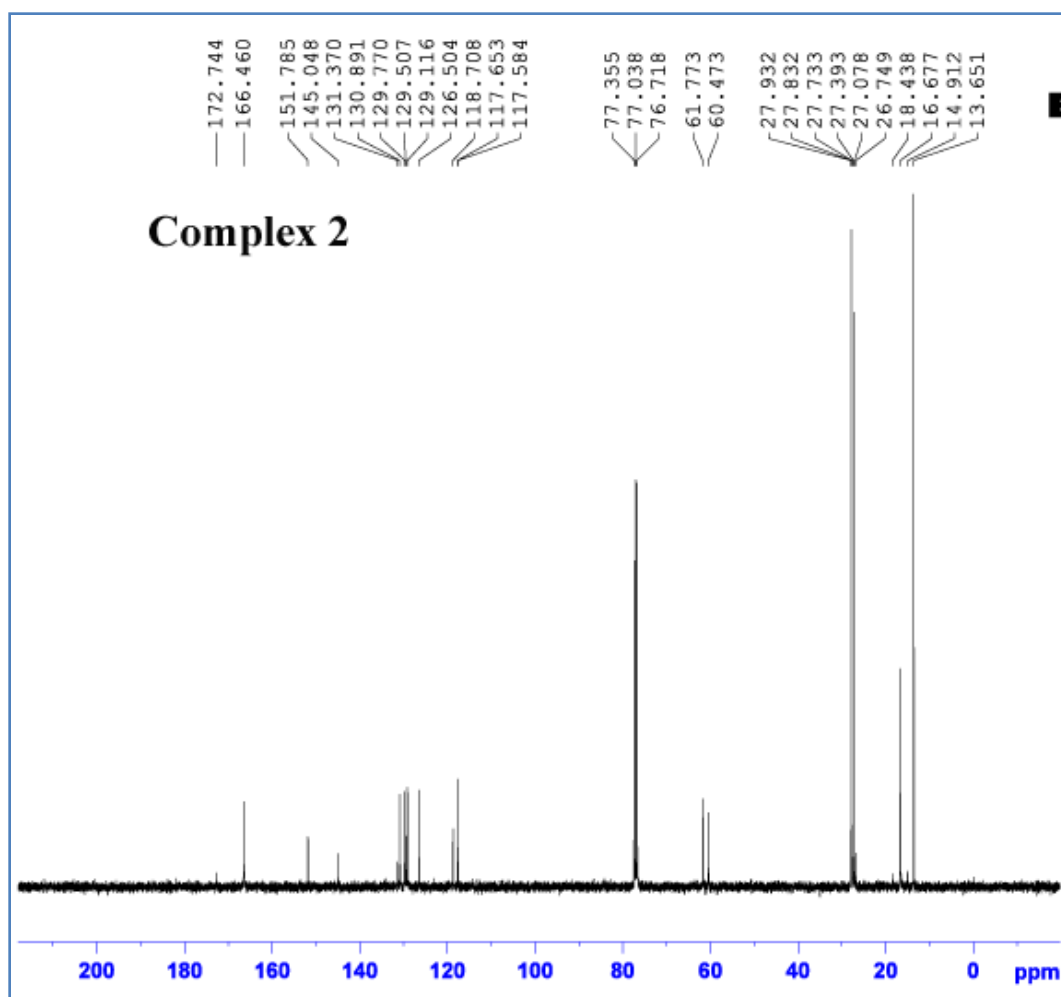

**Figure S9.**  $^{13}\text{C}$  NMR spectrum of the complex **2**.



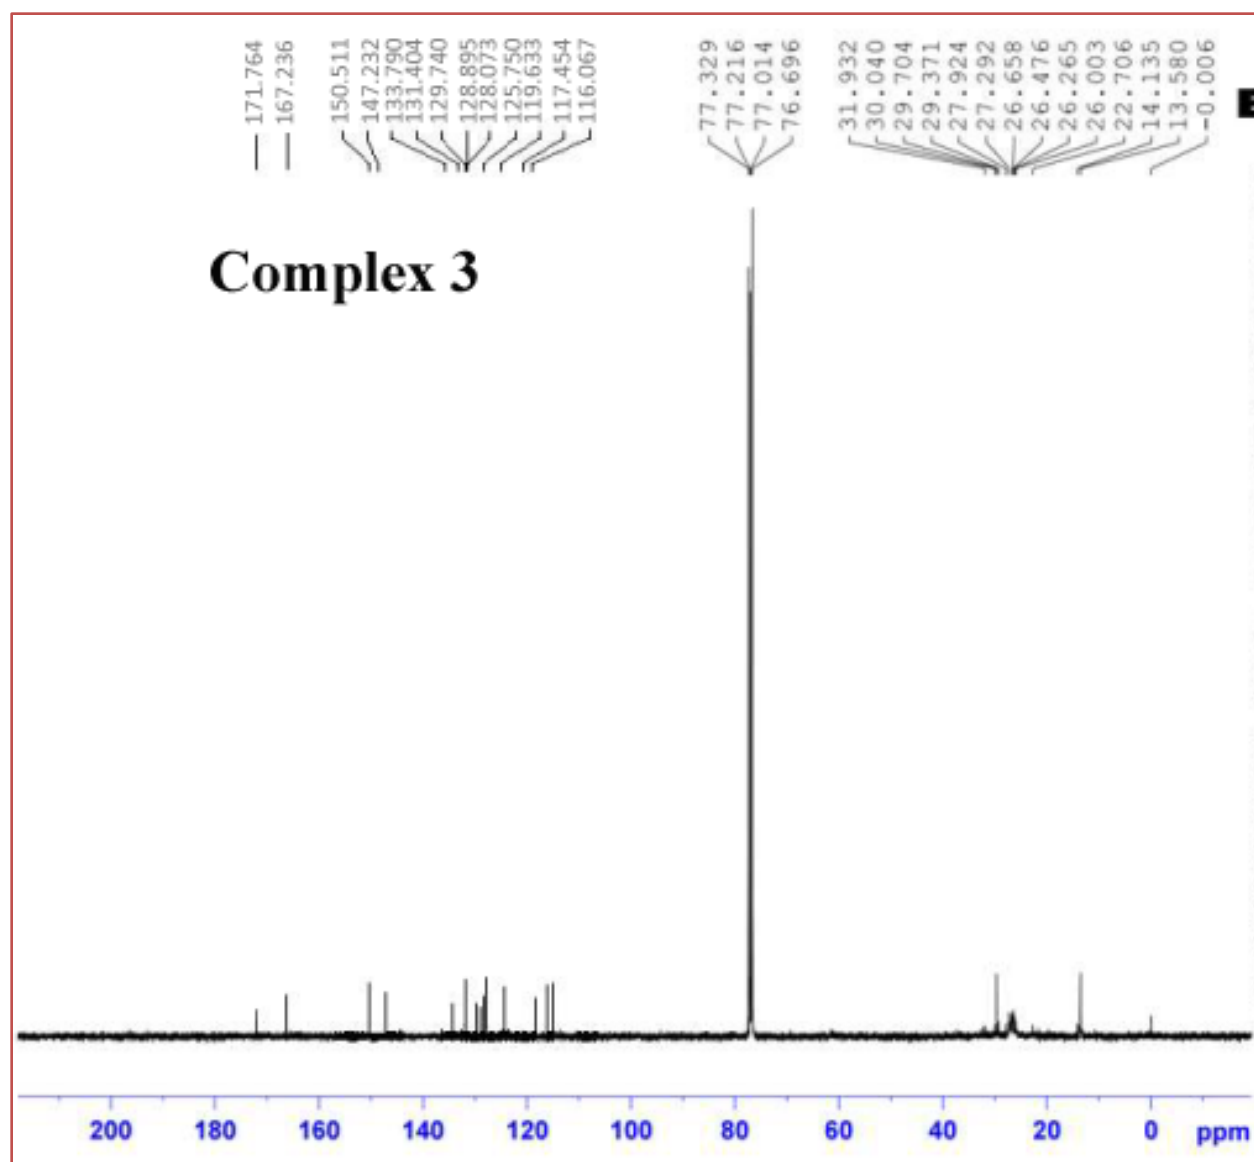

**Figure S10.**  $^{13}\text{C}$  NMR spectrum of the complex **3**.

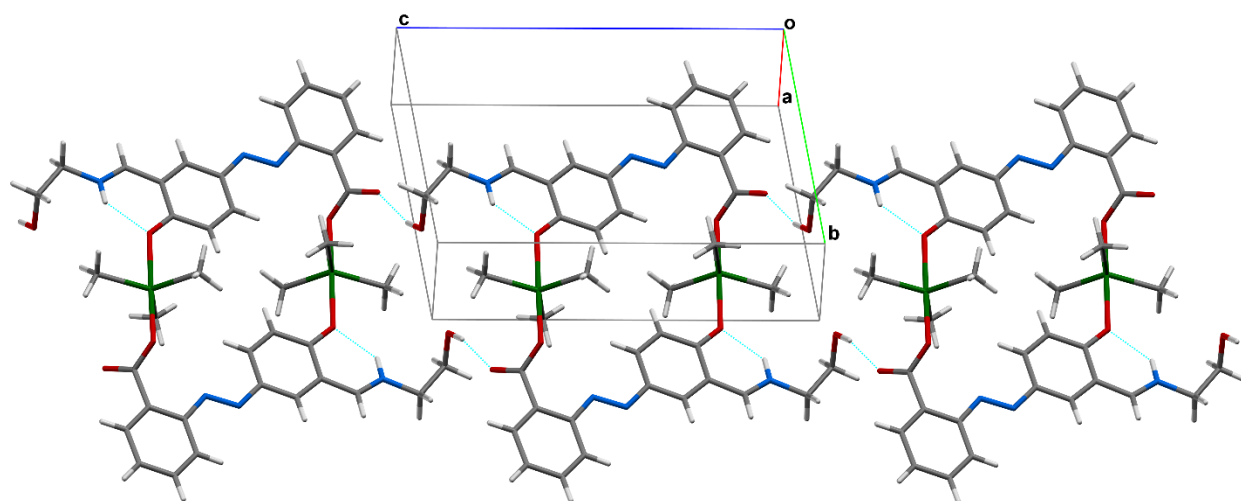

**Figure S11.** Molecular packing of **1**

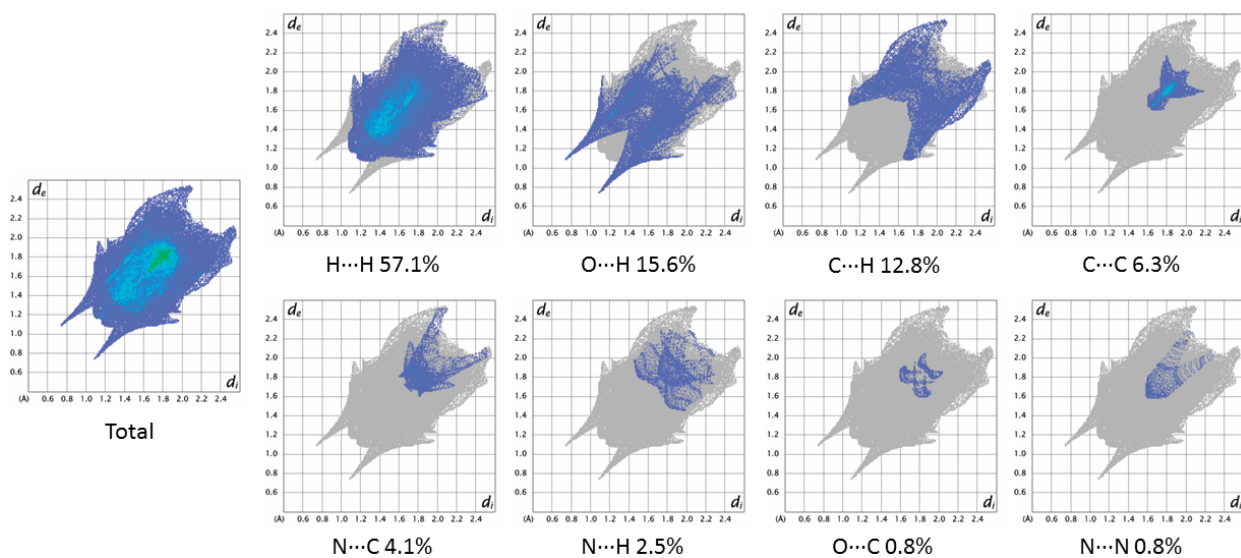

**Figure S12.** Fingerprint plots from Hirshfeld surface analysis for the X-ray structure **1**.
